# Supplementary material
Source: PubMed Central journal article supplement (PMC1851818)
Supplement: plntphys_pp.106.093971_4.pdf [file plntphys_pp.106.093971_4.pdf]

## SUPPLEMENTAL FIGURE LEGENDS

**Supplement Figure 1.** Decrease in *WRKY75* transcripts as Pi-deprived plants are replenished with Pi.

Plants which were Pi-deprived for 7 d were moved into Pi-sufficient media and the expression of *WRKY75* was monitored at 0h, 30m, 1h and 3h by collecting the plant tissue at these time points. Ten µg of total RNA from these samples was separated electrophoretically and blotted onto a nylon membrane which was then probed with a <sup>32</sup>P-labeled *WRKY75* cDNA. EtBr stained ribosomal RNA prior to transfer is shown to indicate loading and integrity of the RNA.

**Supplement Figure 2.** Comparative distribution pattern of Pi in *WRKY75* RNAi plants. Ten day old wild-type (closed circles) and *WRKY75* RNAi plants (open squares) were fed [<sup>33</sup>P]orthophosphate for 4 h and washed with a de-sorbition solution for 2 h. The pattern of <sup>33</sup>P distribution across the leaves and apex of the RNAi mutant and the wild type plants was determined after 10 d. Error bars represent SE ( $n = 3$ ). The differences in the values representing the wild type and RNAi mutants were not statistically significant ( $P < 0.05$ ).

**Supplement Figure 3.** Total Pi concentration in *WRKY75* RNAi and wild type seedlings. Pi concentration in leaves (white bars) and roots (black bars) of 14 d old wild type and *WRKY75* RNAi seedlings grown in petri plates with Pi (P+) and without Pi (P-) for 7 days. Error bars indicate SE ( $n = 3$ ) and different letters above the bars represent means which are statistically different ( $P < 0.05$ ).
