# Supplementary material
Source: PubMed Central journal article supplement (PMC1851818)

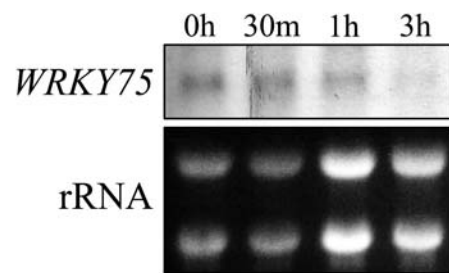

Supplement: plntphys_pp.106.093971_1.pdf [file plntphys_pp.106.093971_1.pdf]

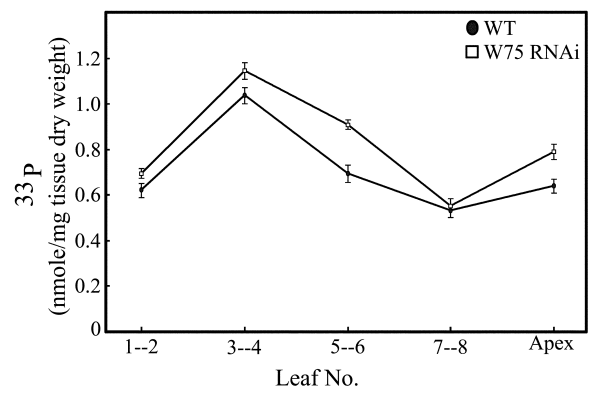

Supplement: plntphys_pp.106.093971_2.pdf [file plntphys_pp.106.093971_2.pdf]

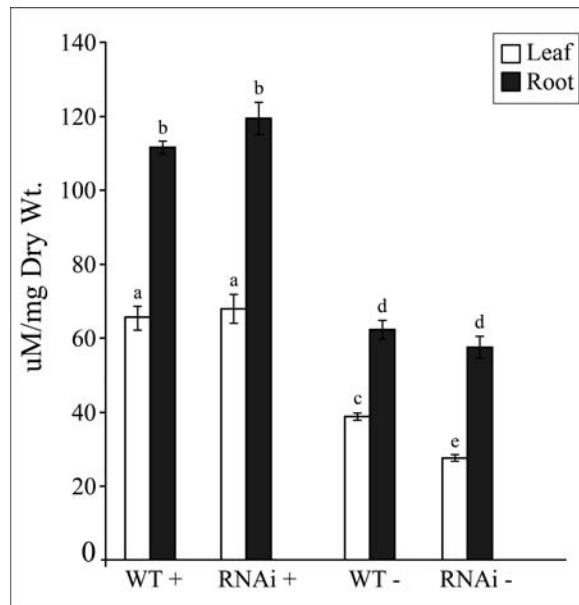

Supplement: plntphys_pp.106.093971_3.pdf [file plntphys_pp.106.093971_3.pdf]
